# Supplementary material for: Unveiling two-dimensional magnesium hydride as a hydrogen storage material via a generative adversarial network
Source: Royal Society of Chemistry journal article supplement (doi:10.1039/d1na00862e), 2022-01-01
Supplement: d1na00862e1.pdf [file d1na00862e1.pdf]

**Supplementary Information**

**Unveiling two-dimensional magnesium hydride for hydrogen storage material via generative adversarial network**

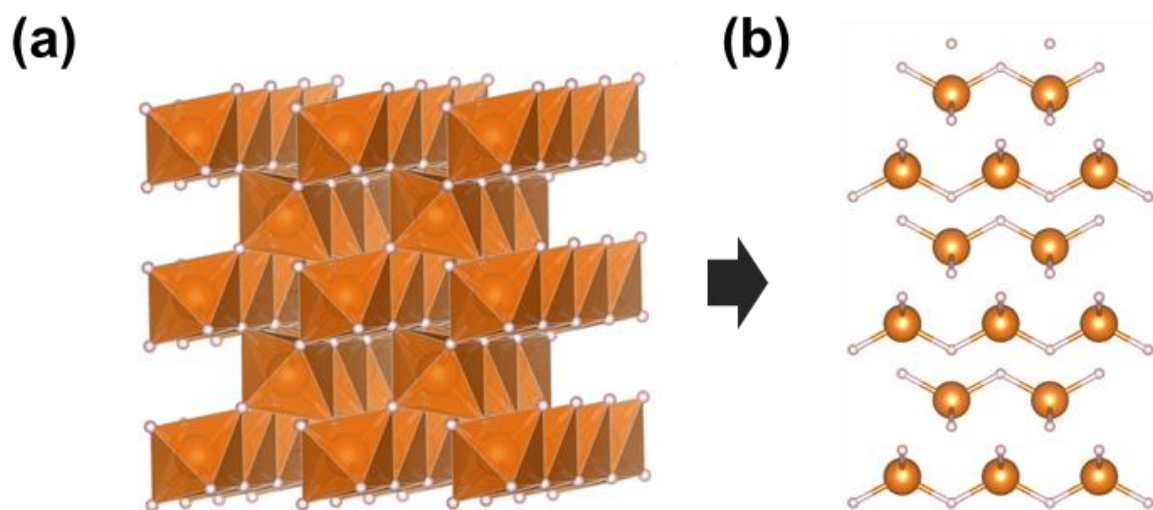

**Figure S1.** Two phases of MgH<sub>2</sub>, (a) the tetragonal MgH<sub>2</sub> with symmetry of  $P4_2/mnm$ ,  $\alpha$ -phase and (b) the layered bulk structure of 2D II-phase,  $P4_2/nmc$ .

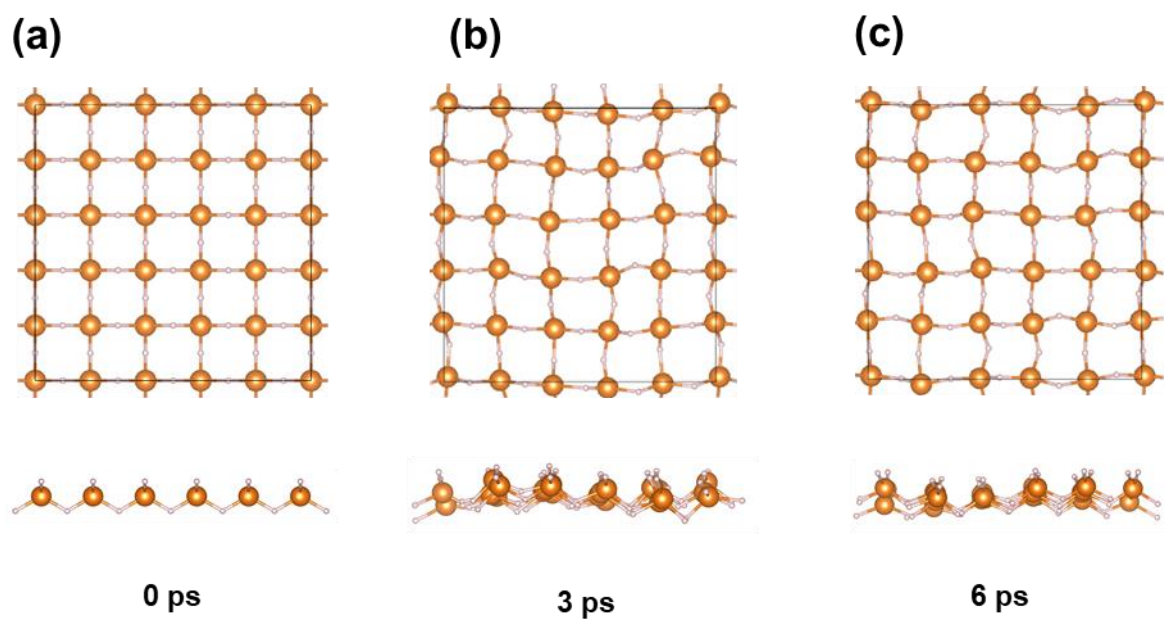

**Figure S2.** Snapshots (top and side views) of  $5 \times 5 \times 1$  supercell of 2D  $P-4m2$   $MgH_2$  at the (a) 0 ps (b) 3 ps and (c) 6 ps at 300K
